# Supplementary material for: Immune-Deficient Pfp/Rag2−/− Mice Featured Higher Adipose Tissue Mass and Liver Lipid Accumulation with Growing Age than Wildtype C57BL/6N Mice
Source: MDPI journal article supplement (doi:10.3390/cells8080775), 2019-07-25

## Supplementary Materials

**Table S1.** List of proteins detected by the Proteome Profiler™ Mouse Adipokine Array Kit.

| Adipokine          | Alternative Name | Entrez Gene ID |
|--------------------|------------------|----------------|
| Adiponectin        | Acrp30/AidipoQ   | 11450          |
| AgRP               | ART              | 11604          |
| ANGPT-L3           | ---              | 30924          |
| C-reactive Protein | CRP              | 12944          |
| DPPIV              | CD26/DPP4        | 13482          |
| Endocan            | ESM-1            | 71690          |
| Fetuin A           | AHSG             | 11625          |
| FGF acidic         | FGF-1            | 14164          |
| FGF-21             | ---              | 56636          |
| HGF                | ---              | 15234          |
| ICAM-1             | CD54             | 15894          |
| IGF-I              | Somatomedin C    | 16000          |
| IGF-II             | Somatomedin A    | 16002          |
| IGFBP-1            | ---              | 16006          |
| IGFBP-2            | ---              | 16008          |
| IGFBP-3            | ---              | 16009          |
| IGFBP-5            | ---              | 16011          |
| IGFBP-6            | ---              | 16012          |
| IL-6               | ---              | 16193          |
| IL-10              | ---              | 16153          |
| IL-11              | ---              | 16156          |
| Leptin             | OB               | 16846          |
| LIF                | ---              | 16878          |
| Lipocalin-2        | NGAL             | 16819          |
| MCP-1              | CCL2/JE          | 20296          |
| M-CSF              | CSF-1            | 12977          |
| Oncostatin M       | OSM              | 18413          |
| Pentraxin 2        | PTX2/SAP         | 20219          |
| Pentraxin 3        | PTX3/TSG-14      | 19288          |
| Pref-1             | DLK-1/FA1        | 13386          |
| RAGE               | ---              | 11596          |
| RANTES             | CCL5             | 20304          |
| RBP4               | ---              | 19662          |
| Resistin           | ADSF/FIZZ3       | 57264          |
| Serpin E1          | PAI-1            | 18787          |
| TIMP-1             | ---              | 21857          |
| TNF- $\alpha$      | TNFSF1A          | 21926          |
| VEGF               | VEGF-A           | 22339          |

**Figure S1.**

Graphical summary of serum parameters. Symbols over columns indicate statistical differences between groups at the  $p<0.05$  level.

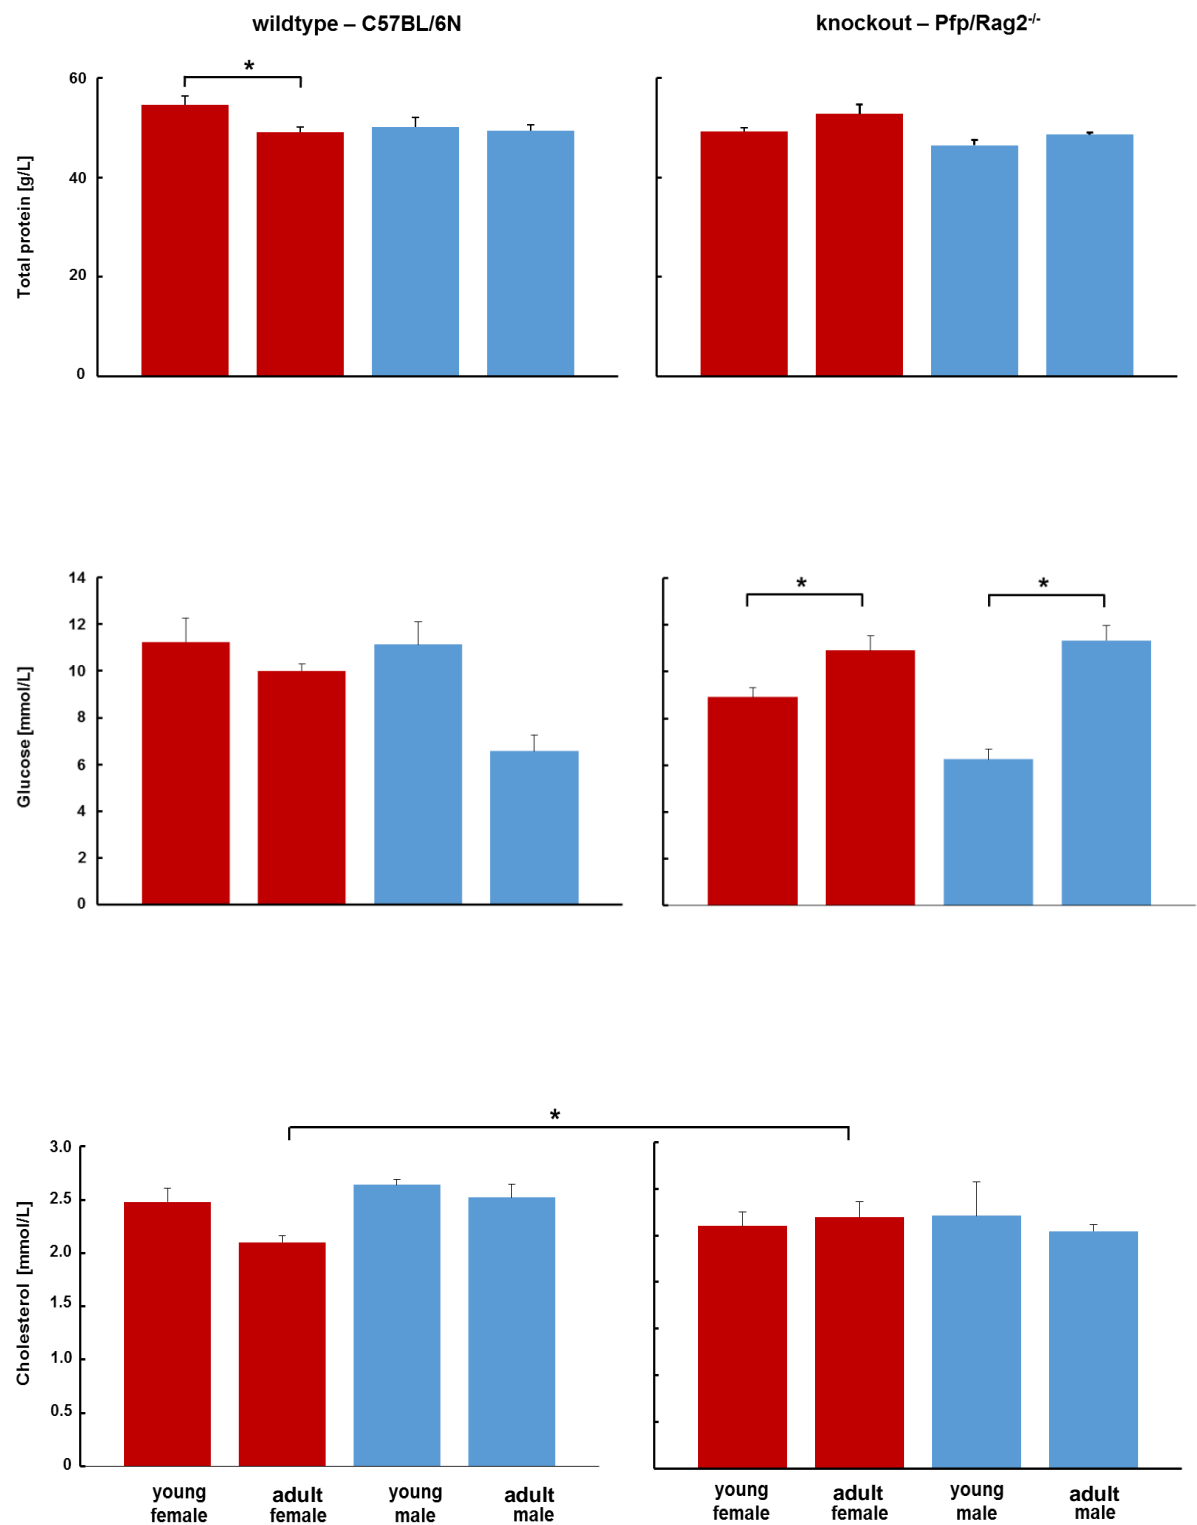

Figure S1, cont.

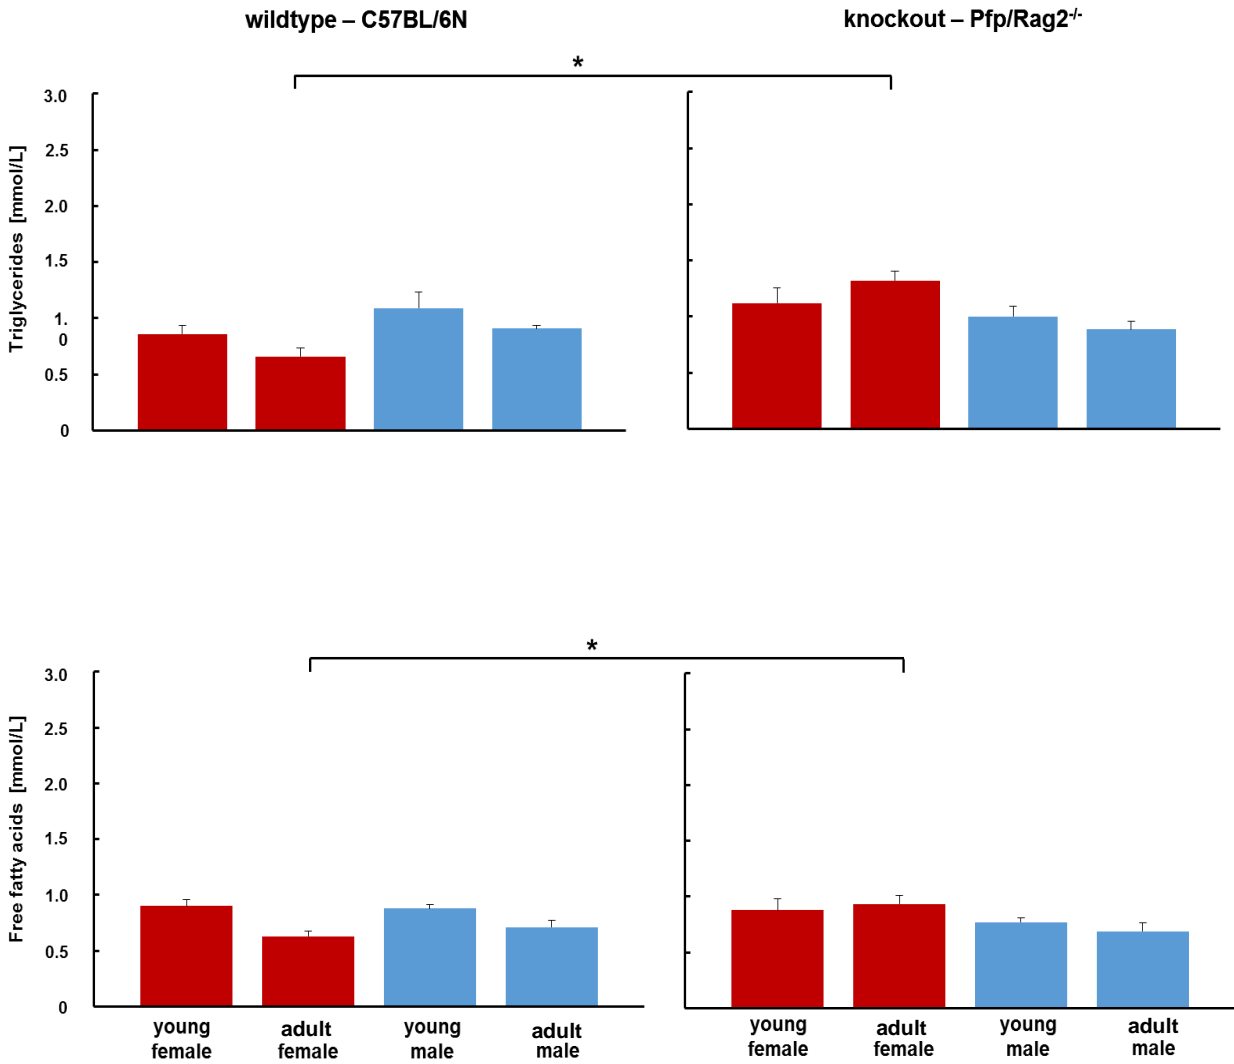

**Figure S2.** Zonal expression of periportal E-cadherin (E-cad) and of perivenous glutamine synthase (GS) and Cytochrome P450 2E1 (CYP2E1) in livers from wildtype and knockout female and male mice. In (a), a comprehensive scheme for the expression of the markers is given showing periportal E-cadherin and perivenous CYP2E1 as well as GS. (b) Immunofluorescent co-staining of E-cad (red) and GS (green) in the upper panels, and of E-cad (red) and CYP2E1 (green) in the lower panels of wildtype (left) and of knockout (right) female and male mice. Pictures are representative out of 3 different animals in each group. PV – portal vein; CV – central vein.

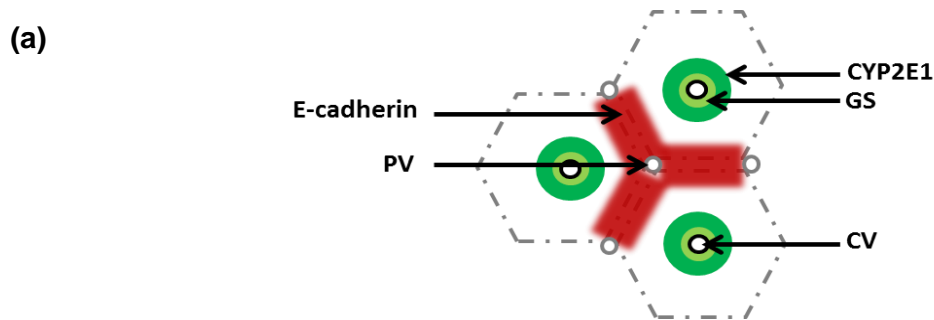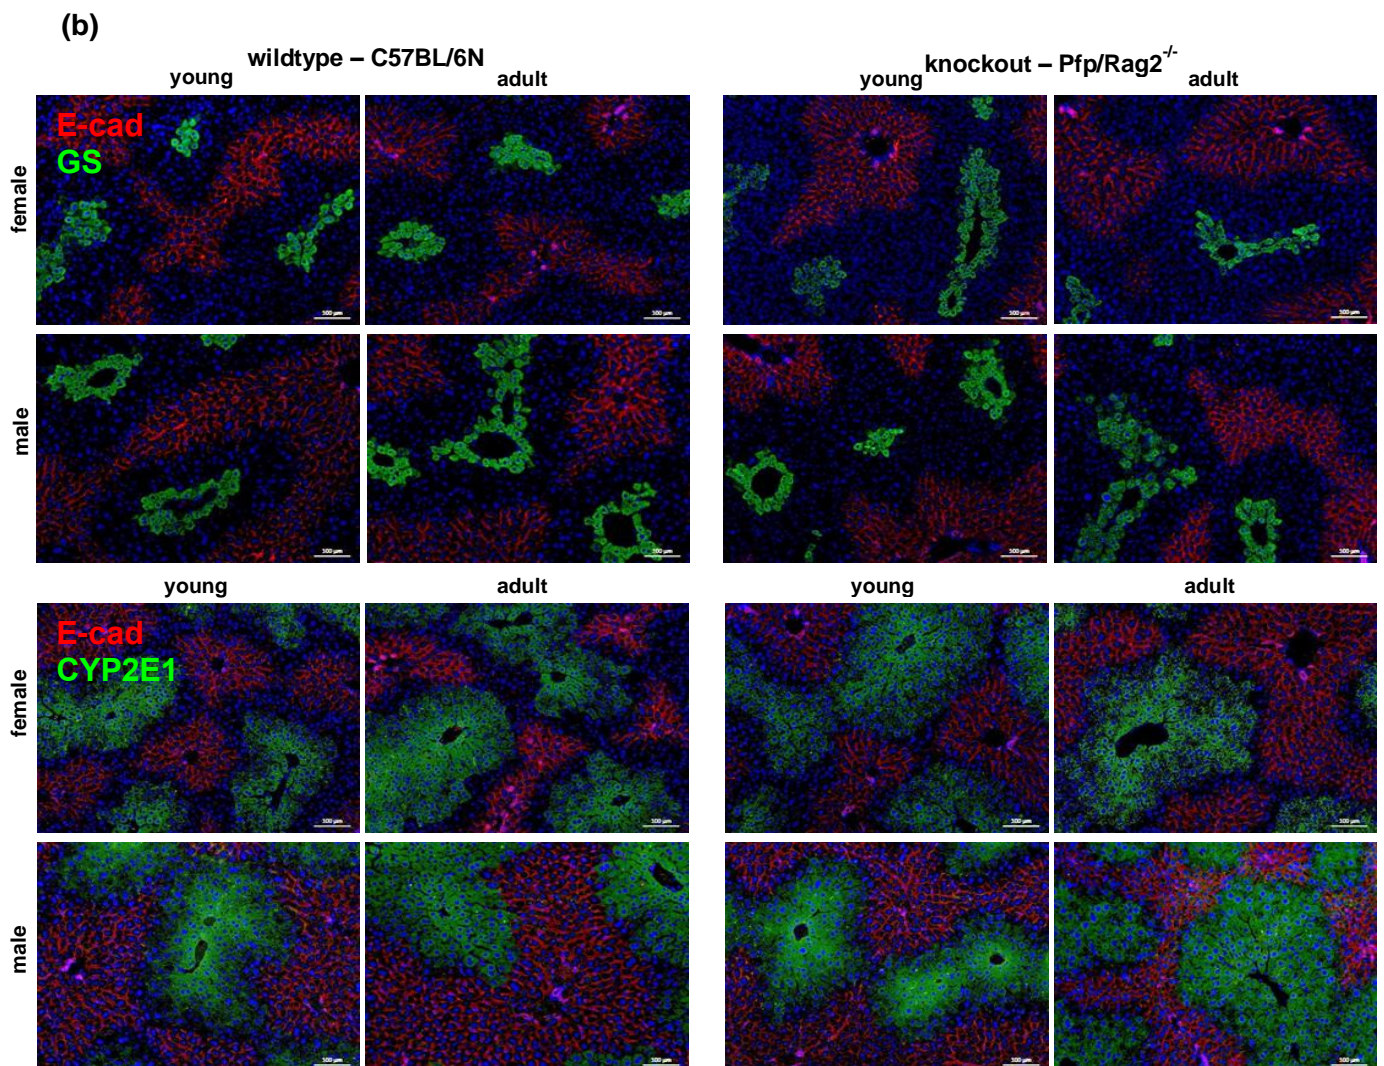

**Figure S3.** Expression levels of mRNA coding for proteins involved in lipid metabolism and function in isolated hepatocytes of wildtype and knockout female and male mice after 3 and 5 days of culture. Expression was quantified by semi-quantitative analysis of PCR products and the signals were normalized to the reference genes. Differences between groups were considered significant, if the p-value was  $\leq 0.05$  (denoted '\*'); whereas  $p \leq 0.01$ , 0.001 and 0.0001 are denoted as '\*\*', '\*\*\*', and '\*\*\*\*', respectively).

3 days of culture

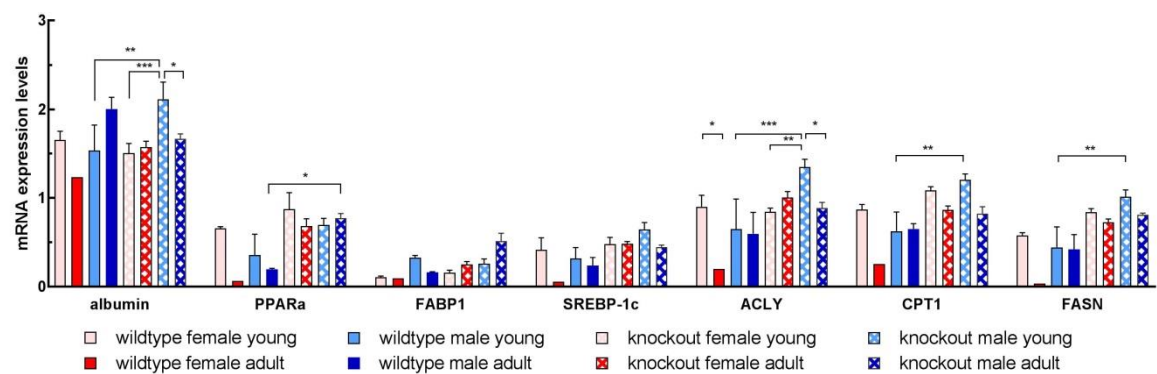

5 days of culture

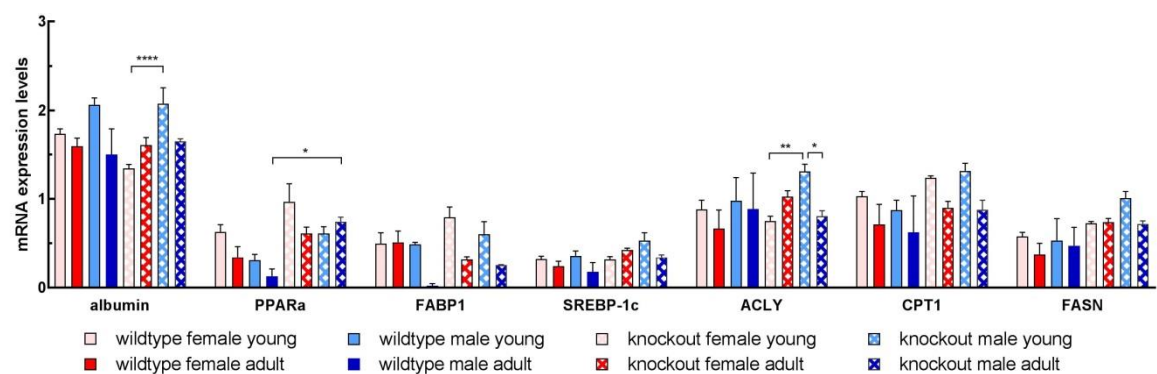

Supplement: s1 [file s1]
